# Supplementary material for: Gravity complexes as a focus of seafloor fluid seepage: the Rio Grande Cone, SE Brazil
Source: Springer Nature journal article supplement (doi:10.1038/s41598-023-31815-1), 2023-03-21
Supplement: 41598_2023_31815_MOESM2_ESM.pdf [file 41598_2023_31815_MOESM2_ESM.pdf]

Supplementary information for GRAVITY COMPLEXES AS A FOCUS OF SEAFLOOR FLUID SEEPAGE:  
THE RIO GRANDE CONE, SE BRAZIL by Ketzer et al.

**Supplementary Note 1**

Information about inspected gas flares with a remotely operate vehicle. Number of bubble streams per flare and bubbling rates were used to calculate methane advective flux assuming bubble diameter of 0.5 cm. The quantity of methane n (moles) in each bubble was calculated based on the universal gas law and converted to mass (see Methods).

**Flare 1 – Area 1 m<sup>2</sup>**

| Stream no. | number of bubbles per second | emissions cm <sup>3</sup> h <sup>-1</sup> | emissions Mg yr <sup>-1</sup> |
|------------|------------------------------|-------------------------------------------|-------------------------------|
| 1          | 2                            | 471.238898                                | 0.5244                        |
| 2          | 3                            | 706.858347                                | 0.7866                        |
| 3          | 2.5                          | 589.048623                                | 0.6555                        |
| 4          | 3                            | 706.858347                                | 0.7866                        |
| 5          | 4.3                          | 1013.16363                                | 1.1275                        |
| Total      | 14.8                         | 3487.16785                                | 3.8806                        |

Flux =  $2.4 \times 10^4$  mmol cm<sup>-2</sup> yr<sup>-1</sup>

**Flare 2 – Area 6 m<sup>2</sup>**

| Stream no. | number of bubbles per second | emissions cm <sup>3</sup> h <sup>-1</sup> | emissions Mg yr <sup>-1</sup> |
|------------|------------------------------|-------------------------------------------|-------------------------------|
| 1          | 4                            | 942.477796                                | 1.04881687                    |
| 2          | 0.5                          | 117.809725                                | 0.13110211                    |
| 3          | 1                            | 235.619449                                | 0.26220422                    |
| 4          | 2                            | 471.238898                                | 0.52440844                    |
| 5          | 4                            | 942.477796                                | 1.04881687                    |
| 6          | 7                            | 1649.33614                                | 1.83542953                    |
| 7          | 2                            | 471.238898                                | 0.52440844                    |
| 8          | 7                            | 1649.33614                                | 1.83542953                    |
| 9          | 4                            | 942.477796                                | 1.04881687                    |
| 10         | 4                            | 942.477796                                | 1.04881687                    |
| 11         | 2                            | 471.238898                                | 0.52440844                    |
| 12         | 1                            | 235.619449                                | 0.26220422                    |
| 13         | 4                            | 942.477796                                | 1.04881687                    |
| 14         | 0.5                          | 117.809725                                | 0.13110211                    |
| 15         | 0.5                          | 117.809725                                | 0.13110211                    |
| 16         | 7                            | 1649.33614                                | 1.83542953                    |
| 17         | 4                            | 942.477796                                | 1.04881687                    |
| 18         | 2                            | 706.858347                                | 0.78661266                    |
| 19         | 7                            | 1649.33614                                | 1.83542953                    |
| 20         | 2                            | 471.238898                                | 0.52440844                    |
| 21         | 4                            | 942.477796                                | 1.04881687                    |
| 22         | 4                            | 942.477796                                | 1.04881687                    |
| 23         | 4                            | 942.477796                                | 1.04881687                    |
| 24         | 0.5                          | 117.809725                                | 0.13110211                    |
| 25         | 1                            | 235.619449                                | 0.26220422                    |
| 26         | 4                            | 942.477796                                | 1.04881687                    |
| 27         | 4                            | 942.477796                                | 1.04881687                    |
| 28         | 2                            | 471.238898                                | 0.52440844                    |
| 29         | 4                            | 942.477796                                | 1.04881687                    |
| 30         | 2                            | 471.238898                                | 0.52440844                    |
| 31         | 2                            | 471.238898                                | 0.52440844                    |
| 32         | 0.5                          | 117.809725                                | 0.13110211                    |
| Total      | 97.5                         | 23208.5157                                | 25.8271155                    |

Flux =  $2.7 \times 10^4$  mmol cm<sup>-2</sup> yr<sup>-1</sup>
